# Supplementary material
Source: Springer Nature journal article supplement (https://www.springermedizin.de/resource/supplementary/12880_2013_212_MOESM4_ESM.pdf/9450320)

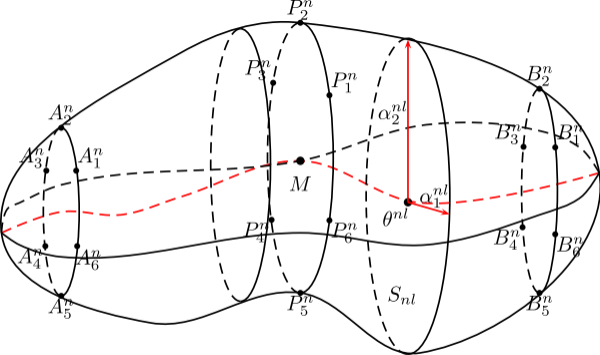

(a) Stacked ellipse model in 3D

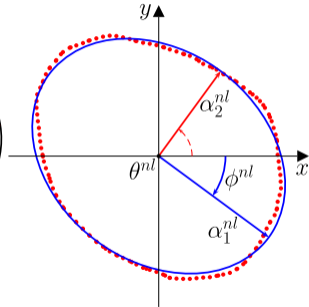

(b) Ellipse model in 2D

Supplement: MOESM4 [file 9450320]
